# Supplementary material for: Hunger Artists: Yeast Adapted to Carbon Limitation Show Trade-Offs under Carbon Sufficiency
Source: PLoS Genet. 2011 Aug 4;7(8):e1002202. doi: 10.1371/journal.pgen.1002202 (PMC3150441; doi:10.1371/journal.pgen.1002202)
Supplement: Table S1 — Competition Coefficients (Relative to Common Reference Strain) in Three Environments. (XLS) [file pgen.1002202.s006.xls]

## Sheet: Sheet1
Table S1. Competition Coefficients (Relative to Common Reference Strain) in Three Environments
Isolate	Competition coefficient
	Aerobic, Glucose	Anerobic, Glucose	Aerobic, Acetate
CP1AB (P)	-0.119 (0.03)	-0.008 (0.00)	-0.14 (0.02)
E1	0.379 (0.04)**	0.231 (0.03)**	0.32 (0.05)**
E2	0.137 (0.01)**	0.074 (0.01)**	0.48 (0.07)**
E3	0.002 (0.01)*	0.019 (0.01)*	0.33 (0.04)**
E4	0.006 (0.01)*	0.255 (0.05)**	0.29 (0.02)**
E5	0.284 (0.03)**	0.096 (0.01)**	0.05 (0.07)*
** represents p<0.01 & * represents p<0.05 in 2-tailed t-test between 3 biological replicates of evolved vs. parent
values are mean (standard error of the mean) of three biological replicates
