# Supplementary material for: Hunger Artists: Yeast Adapted to Carbon Limitation Show Trade-Offs under Carbon Sufficiency
Source: PLoS Genet. 2011 Aug 4;7(8):e1002202. doi: 10.1371/journal.pgen.1002202 (PMC3150441; doi:10.1371/journal.pgen.1002202)
Supplement: Table S2 — Grand Means of Relative Fitness within Each Alternative Environment. (XLS) [file pgen.1002202.s007.xls]

## Sheet: Sheet1
Table S2. Grand Means of Relative Fitness within Each Alternative Environment
	Aerobic	Anaerobic	Acetate
Grand Mean*	0.28012	0.142587	0.436947
Standard Deviation	0.163591	0.102539	0.161654
Standard Error	0.0422389	0.0264755	0.0417388
	Aer vs An	Aer vs Ace	An vs Ace
p-value, 2-tailed T-test	0.0101047	0.0133688	2.0636e-06
* Grand Means are normalized (Evolved - CP1AB) across all five clones
